# Supplementary material
Source: PubMed Central journal article supplement (PMC4293453)
Supplement: supp_mol.114.095745_Supplement_to_MOL_95745.pdf [file supp_mol.114.095745_Supplement_to_MOL_95745.pdf]

Supplement to

A novel pan-negative-gating modulator of KCa2/3 channels, the fluoro-di-benzoate, RA-2, inhibits EDH-type relaxation in coronary artery and produces bradycardia *in vivo*.

(RA-2, a negative-gating modulator of KCa2/3)

by

Aida Oliván-Viguera, Marta Sofía Valero, Nicole Coleman, Brandon M. Brown,

Celia Laría, M<sup>a</sup> Divina Murillo, José A. Gálvez, María D. Díaz-de-Villegas,

Heike Wulff, Ramón Badorrey, Ralf Köhler

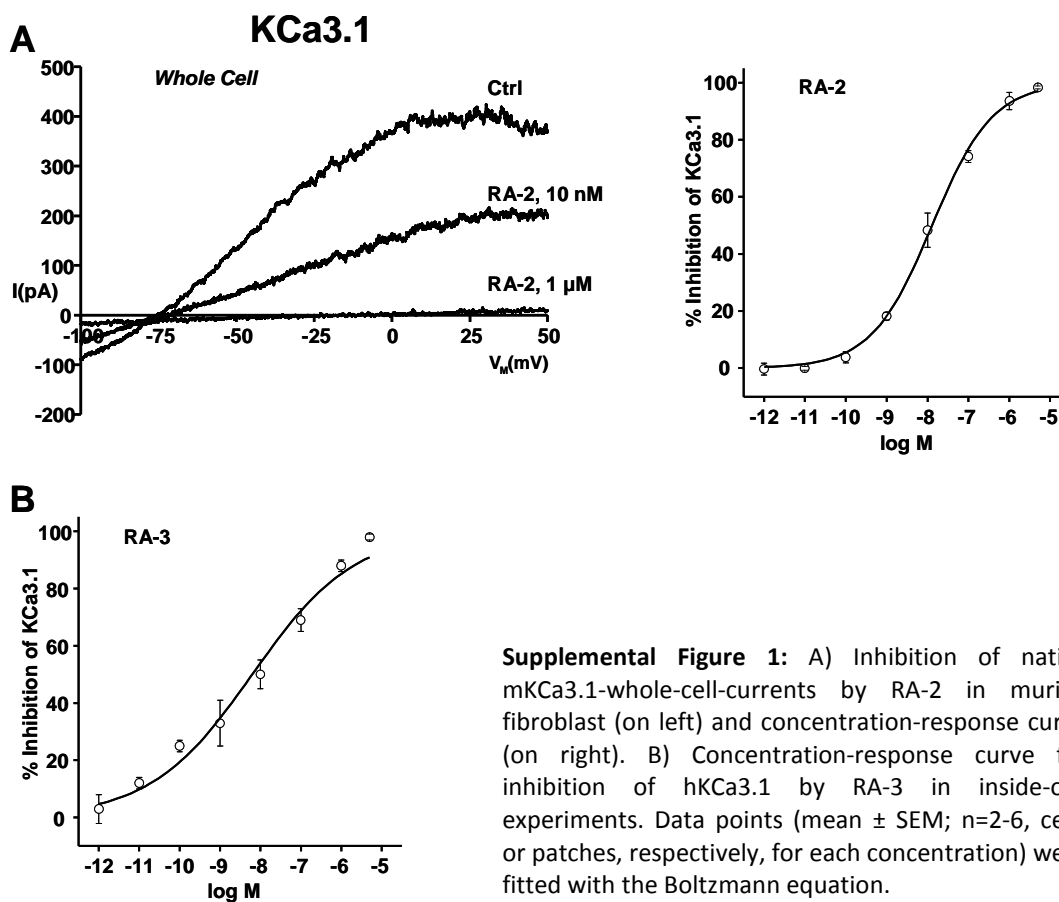

**Supplemental Figure 1:** A) Inhibition of native mKCa3.1-whole-cell-currents by RA-2 in murine fibroblast (on left) and concentration-response curve (on right). B) Concentration-response curve for inhibition of hKCa3.1 by RA-3 in inside-out experiments. Data points (mean  $\pm$  SEM;  $n=2-6$ , cells or patches, respectively, for each concentration) were fitted with the Boltzmann equation.

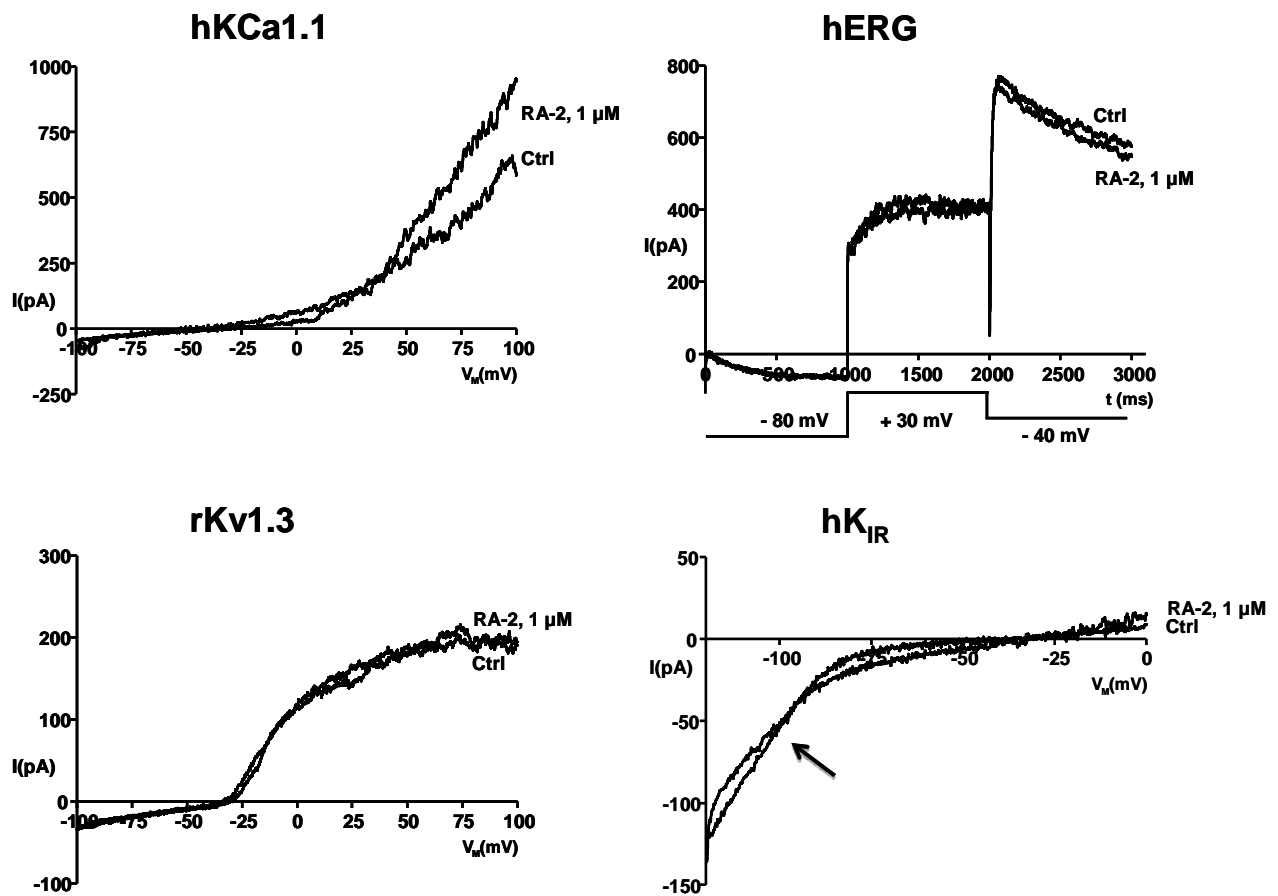

**Supplemental Figure 2:** Representative whole-cell recordings showing that RA-2 did not inhibit hKCa1.1 in U251 glioblastoma cells, cloned hERG, rKv1.3, hK<sub>IR</sub> in U251 cells (arrow in the lower panel on right indicates inward-rectifying hK<sub>IR</sub> currents).

# Molecular Pharmacology, MOL #95745

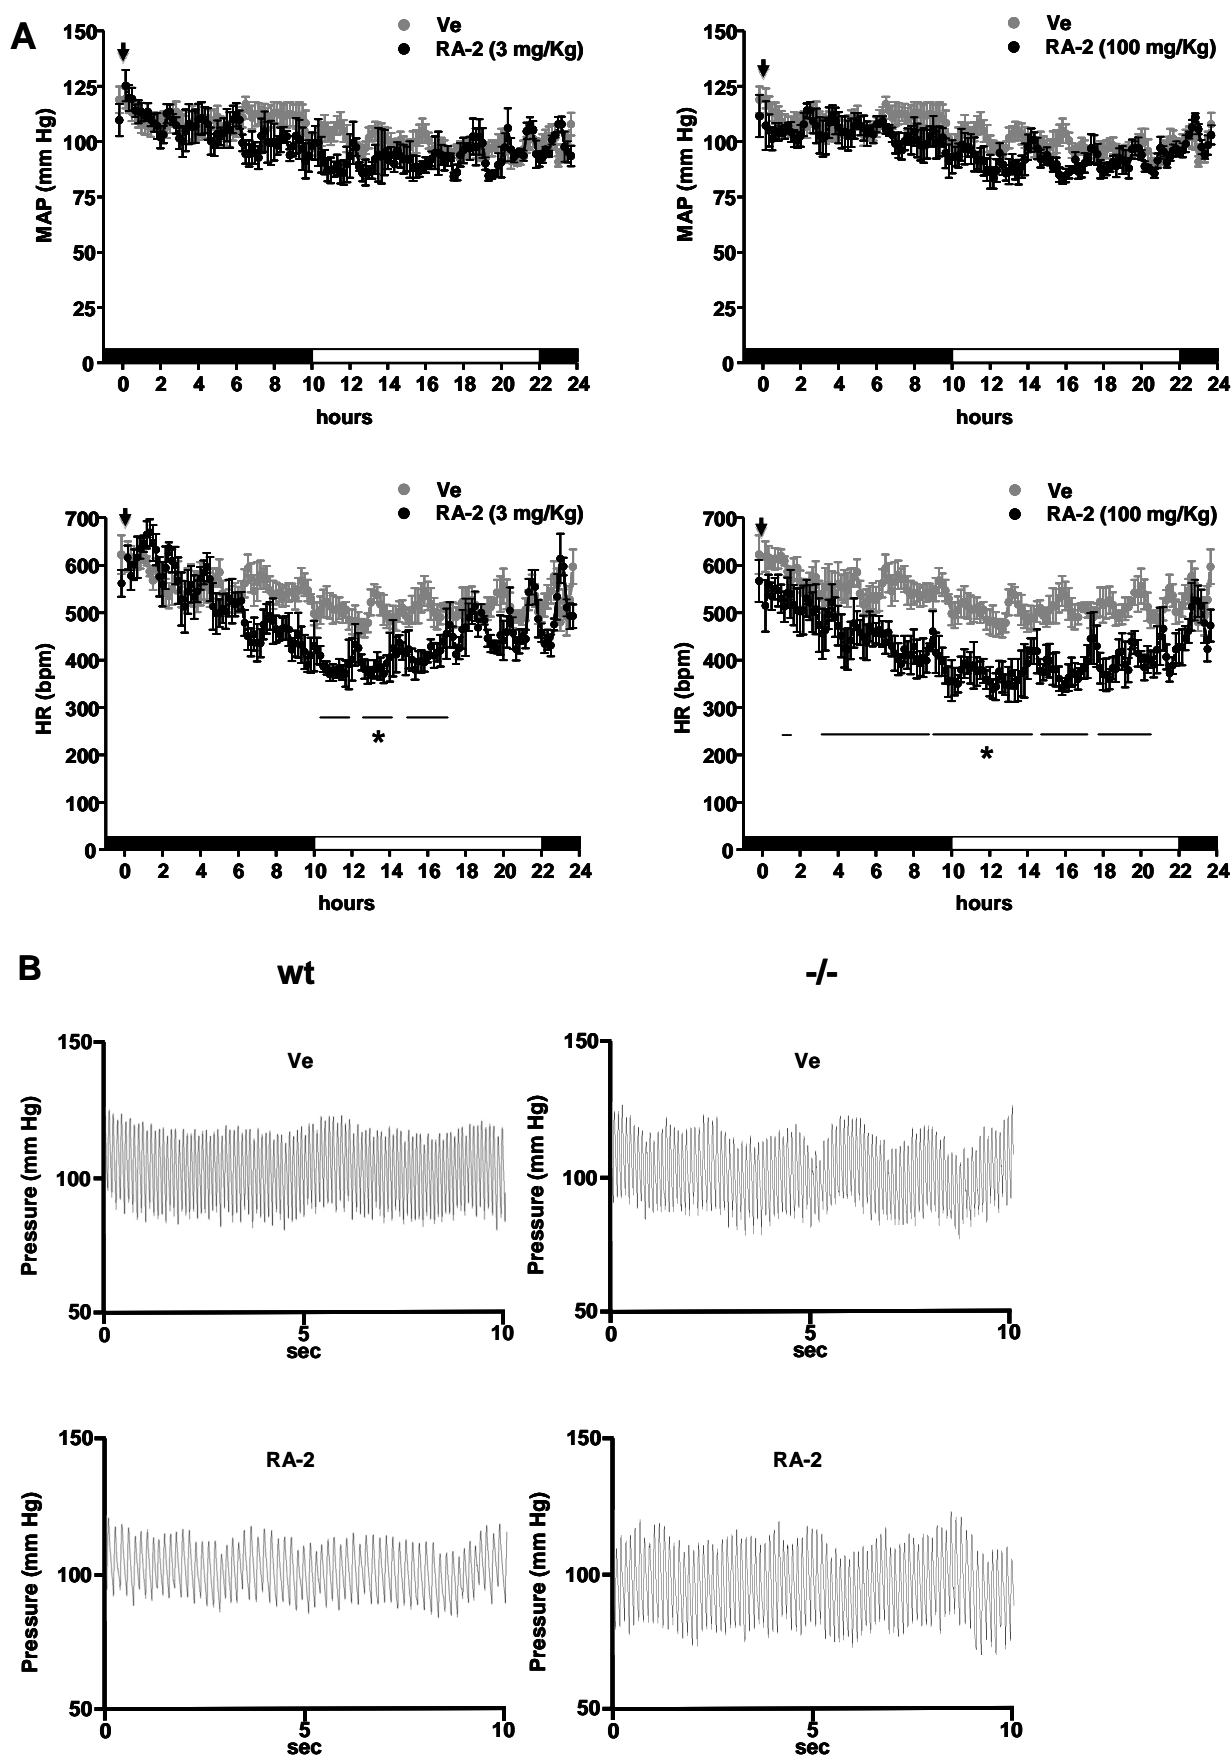

**Supplemental Figure 3:** A) Mean arterial blood pressure (MAP) and heart rate (HR) after intraperitoneal injections of 3 mg/kg (n=4, experiments) and 100 mg/kg (n=4, experiments) into 4 wt mice. Black and white parts of the y-axis indicate dark and light phases and arrow indicates time of injection (t=0). Data on vehicle have been re-plotted from Figure 4. B) Representative recordings of pulse waves after injection of 30 mg/kg RA-2 or vehicle (Ve) in wt (on left) and in KCa3.1<sup>-/-</sup> mice (on right). Data points are mean  $\pm$  SEM; horizontal lines below data points indicate statistical significant difference from vehicle; \* P<0.05; Student T test.

Supplemental Table 1: Effects of RA-2 on other K<sup>+</sup> channels

| Compound                         | % of control at |              |            |
|----------------------------------|-----------------|--------------|------------|
|                                  | 100 nM          | 1 $\mu$ M    | 5 $\mu$ M  |
| <b>hKCa2.3*</b> (in COS7)        |                 |              |            |
| <b>RA-2</b>                      | 38 $\pm$ 2      | 21 $\pm$ 3   | 3 $\pm$ 1  |
| <b>RA-3</b>                      | 68 $\pm$ 4      | 36 $\pm$ 5   | 11 $\pm$ 1 |
| <b>RA-4</b>                      | 71 $\pm$ 5      | 45 $\pm$ 12  | NT         |
| <b>hKCa2.1</b> (in HEK293)       |                 |              |            |
| <b>RA-2</b>                      | 61 $\pm$ 4      | 4 $\pm$ 2    | NT         |
| <b>rKCa2.2</b> (in HEK293)       |                 |              |            |
| <b>RA-2</b>                      | 41 $\pm$ 6      | 10 $\pm$ 1   | 3 $\pm$ 1  |
| <b>hKCa1.1</b> (in U251)         |                 |              |            |
| <b>RA-2</b>                      | NT              | 105 $\pm$ 10 | NT         |
| <b>hKv1.2</b> (in B82)           |                 |              |            |
| <b>RA-2</b>                      | NT              | 94 $\pm$ 4   | NT         |
| <b>rKv1.3</b> (in L929)          |                 |              |            |
| <b>RA-2</b>                      | NT              | 93 $\pm$ 14  | NT         |
| <b>hKv7.4</b> (in HEK293)        |                 |              |            |
| <b>RA-2</b>                      | NT              | 98 $\pm$ 7   | NT         |
| <b>hERG</b> (in HEK293)          |                 |              |            |
| <b>RA-2</b>                      | NT              | 99 $\pm$ 2   | NT         |
| <b>hK<sub>IR</sub></b> (in U251) |                 |              |            |
| <b>RA-2</b>                      | NT              | 102 $\pm$ 10 | NT         |

NT, not tested; data are given as mean  $\pm$  SEM, n  $\geq$  3. \* data from *inside-out* experimentation on cloned hKCa2.3, the other data derived from *whole-cell* experimentation on cloned or native channels in the respective cell line (name in brackets).
